# Supplementary material for: Absence of Evidence for MHC–Dependent Mate Selection within HapMap Populations
Source: PLOS journal article supplement (doi:10.1371/journal.pgen.1000925), 2010-04-29
Supplement: S9 (10.1371/journal.pgen.1000925.s009) [file journal.pgen.1000925.s009]

#### Text S4. Critical impact of an extreme couple on mate-pair MHC dissimilarity

Following the replication of results previously reported by Chaix *et al.* in 28 European couples [13], the number of random trials was increased from 1,000 to 100,000, leading to a weaker  $P$  value ( $P = 0.022$ ) than previously reported ( $P = 0.015$ ) for the MHC dissimilarity of mate pairs relative to random pairs (Table 1). Subsequently removing the single most MHC-dissimilar couple, then repeating the analysis, led to an insignificant result ( $P = 0.052$ ; Table 1 and Supporting Figure 6):

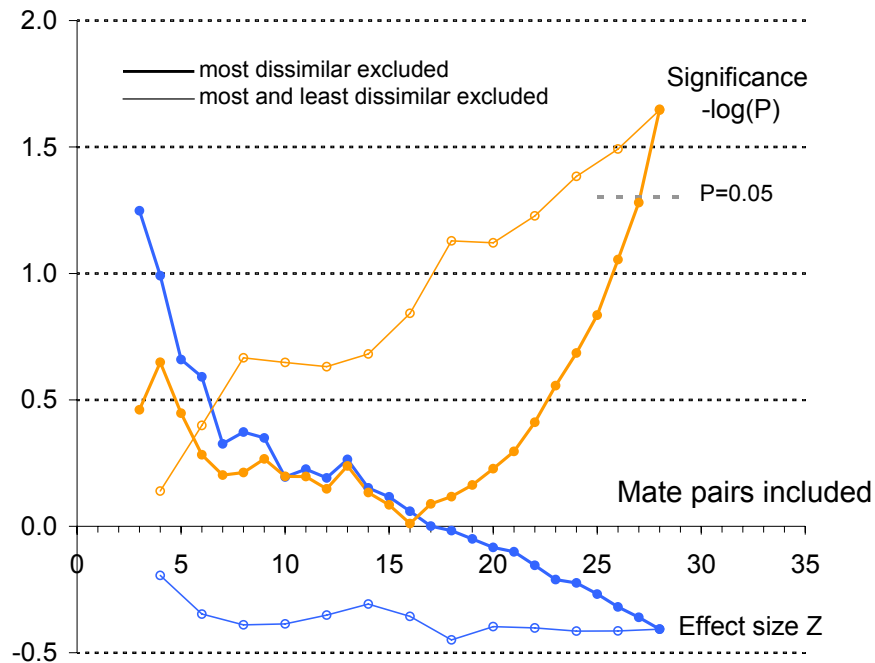

**Supporting Figure 6. Impact of extremes on mate-pair MHC dissimilarity in HapMap Phase 2 Europeans.** The significance ( $P$ ) and effect size ( $Z$ ) of mate-pair MHC dissimilarity relative to random pairs (for  $P$ ) or non-mate pairs (for  $Z$ ) is shown for analyses conducted with the 28 couples analyzed by Chaix *et al.* [13], using identical data and methods except for 100,000 random trials instead of 1,000. Analyses were repeated successively following the exclusion of the most MHC-dissimilar couple (broad lines), or the simultaneous exclusion of the most and least MHC-dissimilar couples (thin lines).
